# Supplementary material for: Cell-Free DNA Variant Sequencing Using CTC-Depleted Blood for Comprehensive Liquid Biopsy Testing in Metastatic Breast Cancer
Source: MDPI journal article supplement (doi:10.3390/cancers11020238), 2019-02-18

**Figure S1:** Overexpression signal frequency in pooled CTCs all of blood samples ( $n = 12$ ) subsequently called CTC-depleted blood and used for cfDNA isolation. The relative frequencies of patients with HR+/HER2- MBC ( $n = 12$ ), exhibiting CTC overexpression signals of the 17 assessed transcripts using the AdnaTest TNBC Panel prototype. 92% of all patients showed mTOR overexpression. *ERBB2/ERBB3* overexpression signals were present in CTCs of 55%/70% patients, respectively.

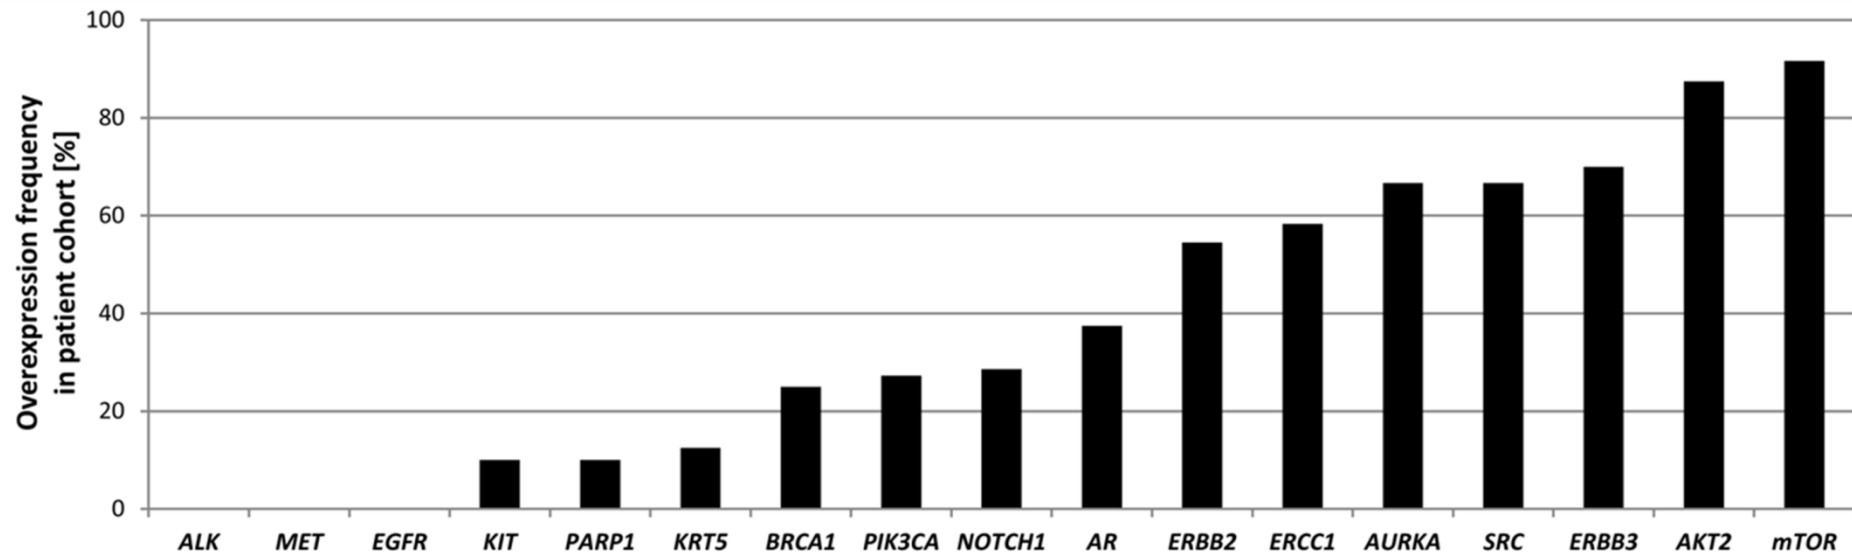

Supplement: s1 [file s1]
